# Supplementary material for: Cellular transitions during cranial suture establishment in zebrafish
Source: PubMed Central journal article supplement (PMC11322166; doi:10.1038/s41467-024-50780-5), 2024-08-13
Supplement: 41467_2024_50780_MOESM3_ESM.pdf [file 41467_2024_50780_MOESM3_ESM.pdf]

### **Description of additional supplementary files**

**Supplementary Data 1.** Enriched gene list by cluster for whole calvaria dataset (related to Fig. 1B).

**Supplementary Data 2.** Enriched gene list by cluster for connective and skeletogenic subset (related to Fig. 1C).

**Supplementary Data 3.** Enriched gene list by cluster for osteoblast and prrx1a+ mesenchyme subset (related to Fig. 1E).

**Supplementary Data 4.** CellChat Signaling pairs for the prrx1a+ mesenchyme subset.

**Supplementary Data 5.** Genotyping primers for mutant alleles.
